# Supplementary material for: Reply to: Cause or consequence?
Source: PubMed Central journal article supplement — Eur Respir J. 2022 Jun 9;59(6):2200103. doi: 10.1183/13993003.00103-2022 (PMC9178210; doi:10.1183/13993003.00103-2022), 2022-06-09

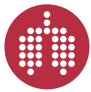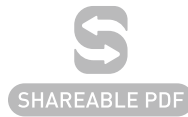

## Reply to: Cause or consequence?

Eric D. Bateman<sup>1</sup>, David B. Price<sup>2,3</sup>, Hao-Chien Wang<sup>4</sup>, Patricia Schonfeldt<sup>5</sup>, Angelina Catanzariti<sup>6</sup>, Ralf J.P. van der Valk<sup>7</sup> and Maarten J.H.I. Beekman<sup>8</sup>

<sup>1</sup>Division of Pulmonology, Dept of Medicine, University of Cape Town, Cape Town, South Africa. <sup>2</sup>Observational and Pragmatic Research Institute, Singapore. <sup>3</sup>Centre of Academic Primary Care, Division of Applied Sciences, University of Aberdeen, Aberdeen, UK. <sup>4</sup>Dept of Internal Medicine, National Taiwan University Hospital, Taipei, Taiwan. <sup>5</sup>Especialista Medicina Interna y Enfermedades Respiratorias, Instituto Nacional del Tórax ITMS Telemedicina de Chile, Santiago, Chile. <sup>6</sup>AstraZeneca, Sydney, Australia. <sup>7</sup>AstraZeneca, Cambridge, UK. <sup>8</sup>AstraZeneca, The Hague, The Netherlands.

Corresponding author: Eric D. Bateman ([eric.bateman@uct.ac.za](mailto:eric.bateman@uct.ac.za))

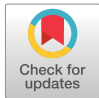

Shareable abstract (@ERSpublications)

**SABINA III shows associations between SABA prescriptions and poor asthma outcomes and does not imply causation. However, implying that high SABA use is simply a “consequence” of poor asthma control is also an oversimplification of a complex issue.** <https://bit.ly/3rXKSGm>

**Cite this article as:** Bateman ED, Price DB, Wang H-C, *et al.* Reply to: Cause or consequence?. *Eur Respir J* 2022; 59: 2200103 [DOI: 10.1183/13993003.00103-2022].

This single-page version can be shared freely online.

Copyright ©The authors 2022.

This version is distributed under the terms of the Creative Commons Attribution Non-Commercial Licence 4.0. For commercial reproduction rights and permissions contact [permissions@ersnet.org](mailto:permissions@ersnet.org)

Received: 14 Jan 2022

Accepted: 19 Jan 2022

*Reply to F.M. Volpe:*

We thank F.M. Volpe for questioning whether the results of the SABINA III study showing associations between short-acting  $\beta_2$ -agonist (SABA) prescriptions and poor asthma outcomes should be regarded as “cause or consequence.” We agree that causation cannot be assumed and stated this clearly as follows “this cross-sectional study does not permit an assessment of a causal link between SABA prescriptions and asthma outcomes and does not discount reverse causality; the results simply represent an association” [1]. But implying that high levels of SABA use is simply a “consequence” is also an oversimplification of a complex issue. First, besides the consistent results from epidemiological studies, there are many mechanistic studies of the negative effects of regular SABA use on biomarkers of airway inflammation, airway hyper-responsiveness, asthma symptom control and exacerbation risk, so causation is not ruled out [2, 3]. Further, while logical to consider that high use of an as-needed medication for symptoms must represent poor control, we would point out that a central purpose of our paper was to assess not inhaler use, but SABA prescriptions by clinicians and purchase over the counter. These are systemic issues concerning physician behaviour and access to SABAs that, in the face of excessive use and poor asthma control, permit or even encourage SABA use, which is contrary to asthma guideline recommendations [4]. The “long list” of recommendations for addressing this situation is therefore highly pertinent to the objectives of the paper and we agree that these may, and in fact are intended to, have “profound implications... for clinical practice and public health” [4–6].

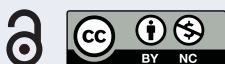

Supplement: ERJ-00103-2022.Shareable.pdf [file ERJ-00103-2022.Shareable.pdf]
